# Supplementary material for: International survey on diagnosis and management of hypotension in extremely preterm babies
Source: Springer Nature journal article supplement (doi:10.1007/s00431-013-2251-9), 2014-01-03
Supplement: MOESM1 [file 8512140]

### 1. Characteristics of your NICU (Please note that Level III relates tertiary level care)

- Level I
- Level II
- Level III

Other (please specify)

### 2. Characteristics of your NICU:

Total number of intensive care beds

Number of very low birth weight infants annually

### 3. Is your NICU part of a paediatric hospital or a general hospital? (The option will be to tick as many as suitable)

- Paediatric hospital
- General hospital
- Free standing maternity
- University hospital

### 4. Do you have any institutional recommendations regarding the diagnosis and treatment of hypotension in first 72 hours after delivery in the ELGAN?

|     | Diagnosis                | Treatment                |
|-----|--------------------------|--------------------------|
| Yes | <input type="checkbox"/> | <input type="checkbox"/> |
| No  | <input type="checkbox"/> | <input type="checkbox"/> |

### 5. How do you evaluate poor perfusion in ELGA newborn?

- Clinical examination
- Laboratory testing
- Ancillary methods (ECHO etc.)
- All of the above

### 6. If you use clinical examination what parameters do you measure?

|                       | Yes                      | No                       |
|-----------------------|--------------------------|--------------------------|
| Capillary refill time | <input type="checkbox"/> | <input type="checkbox"/> |
| Urine output          | <input type="checkbox"/> | <input type="checkbox"/> |
| Colour of peripheries | <input type="checkbox"/> | <input type="checkbox"/> |
| Heart rate            | <input type="checkbox"/> | <input type="checkbox"/> |
| Warmth of toes        | <input type="checkbox"/> | <input type="checkbox"/> |
| Activity level        | <input type="checkbox"/> | <input type="checkbox"/> |

Other (please specify)

**7. What capillary refill time do you consider abnormal and where do you measure it?**

|                             | Abnormal time        | Place of measurement |
|-----------------------------|----------------------|----------------------|
| Capillary refill time (CRT) | <input type="text"/> | <input type="text"/> |

**8. What laboratory tests do you use to evaluate poor perfusion in ELGA newborn?**

- Base excess
- Lactate (absolute value)
- Lactate (direction of change)
- Other (please specify)
- Haemoglobin
- pH
- Significance of lactate change

### 9. What ancillary methods do you use to evaluate poor perfusion in ELGA newborn?

- ECHO
- Mixed venous O2
- Perfusion index
- EEG/aEEG
- Temperature
- NIRS
- CVP (Central Venous Pressure)
- Other (please specify)

### 10. Do you measure blood markers of myocardial dysfunction?

|                           | Answer               | If "YES"             |
|---------------------------|----------------------|----------------------|
| Blood markers measurement | <input type="text"/> | <input type="text"/> |

### 11. Under which circumstances do you consider ELGA newborn to have low blood pressure?

- According to a predefined percentile
- According to a mean blood pressure is less than gestational age
- According to a limit you believe to be associated with poorer outcomes
- Other (please specify)

### 12. If functional ECHO is performed, what parameters of low perfusion do you measure?

- Left cardiac output
- Fractional shortening of left ventricle
- Right cardiac output
- SVC flow
- Other (please specify)

### 13. If hypotension is determined, what initial treatment you choose?

- Volume administration
- Inotropes
- Steroids

### 14. If volume, what agent and amount do you use initially?

|               | Agent                | Amount               |
|---------------|----------------------|----------------------|
| Volumotherapy | <input type="text"/> | <input type="text"/> |

**15. If volume, what maximum cumulative amount of volume do you use?**

20 ml/kg

30 ml/kg

40 ml/kg

More

No cumulative volume

**16. What inotropes do you use initially?**

- Dopamine
- Dopamine and dobutamine
- Dobutamine
- Other (please specify)
- Norepinephrine
- Vasopressin
- Milrinone

**17. Please specify the starting dose and maximum dose from your chosen agent.**

Starting dose

Maximum dose

**18. If initially inotrope therapy failed what is your second choice?**

- Dopamine
- Norepinephrine
- Vasopressin
- Other (please specify)
- Dopamine and dobutamine
- Dobutamine
- Epinephrine
- Milrinone
- Steroids
- Levosimendane

**19. What preparation of steroid do you administer for hypotension?**

- Hydrocortisone
- Methylprednisolone
- Dexamethasone
- None

Other (please specify)

**20. If you administer steroids for hypotension, please specify dose in mg/kg.**

Hydrocortisone

Methylprednisolone

Dexamethasone

Other

**21. Do you change your approach when you consider hemodynamically significant ductus arteriosus is present?**

- Yes
- No

**22. If your answer of previous question (21) is Yes, please specify.**

- |                                                 |                                                        |
|-------------------------------------------------|--------------------------------------------------------|
| <input type="checkbox"/> No volumotherapy       | <input type="checkbox"/> Increase hematocrit           |
| <input type="checkbox"/> Indomethacin/ibuprofen | <input type="checkbox"/> Change of ventilatory setting |
| <input type="checkbox"/> Fluid restriction      |                                                        |

**23. Do you practice delayed cord clamping?**

- Yes
- No

**24. Do you believe that permissive hypotension is an acceptable strategy for treating ELGA newborn infants during the first few days of life?**

- Yes
- No

**25. Please fill the country of your hospital.**
